# Supplementary material for: Solving the Differential Biochemical Jacobian from Metabolomics Covariance Data
Source: PubMed Central journal article supplement (PMC3977476; doi:10.1371/journal.pone.0092299), 2014-04-02

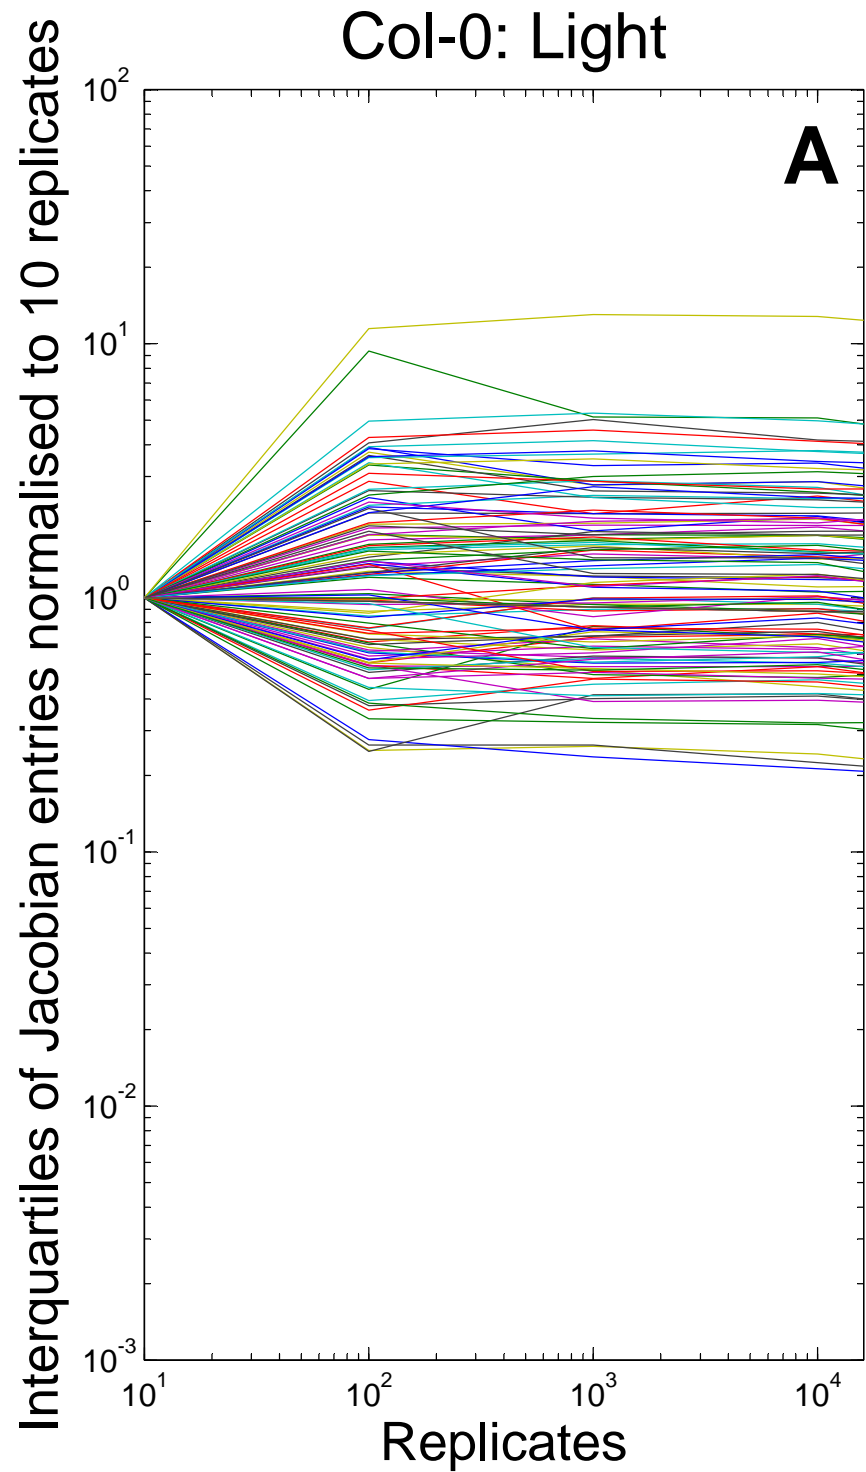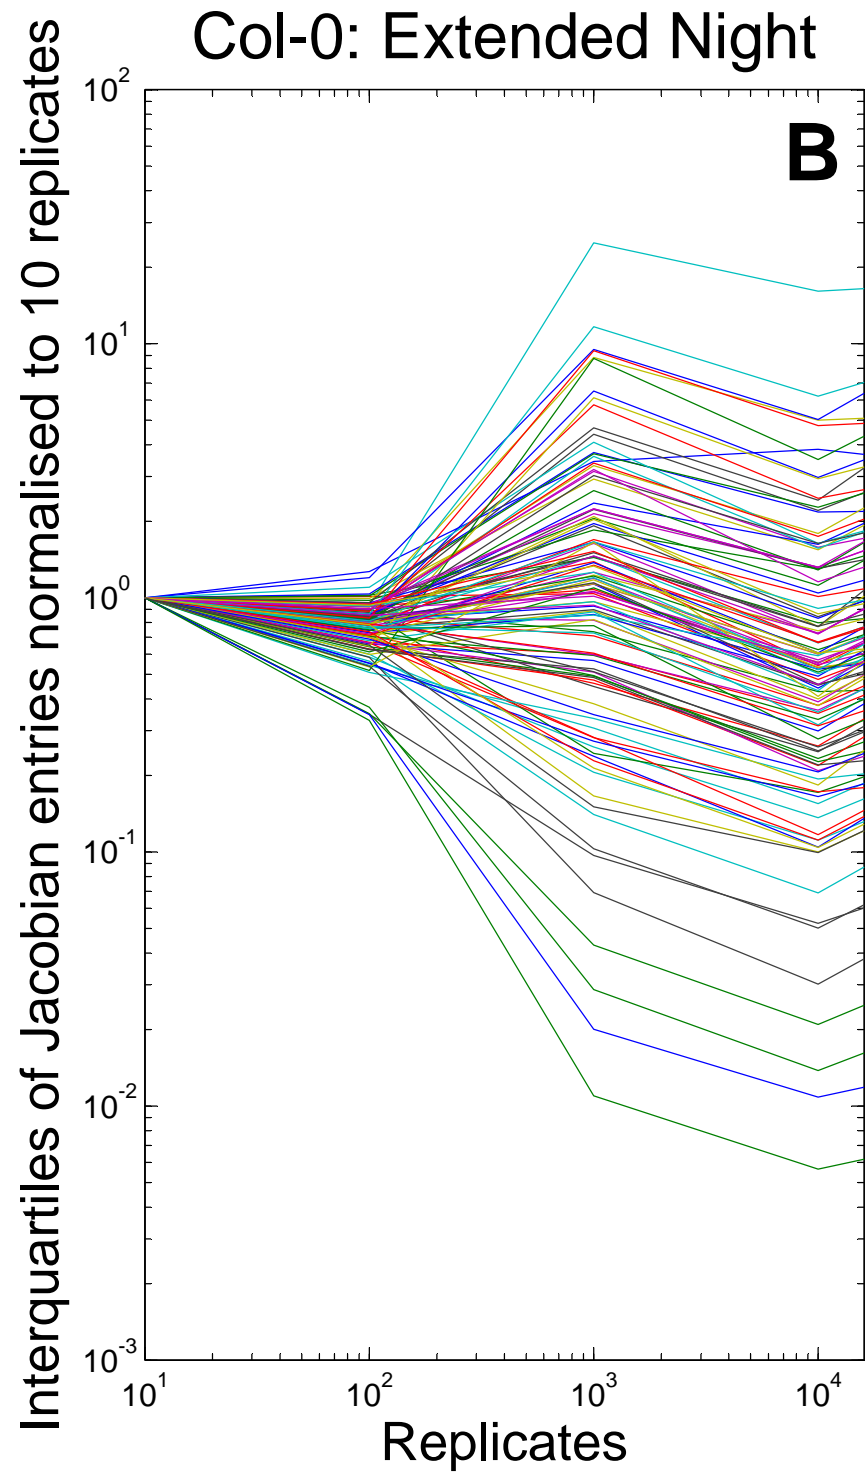

Supplement: pone.0092299.s001.pdf [file pone.0092299.s001.pdf]
